# Supplementary material
Source: Springer Nature journal article supplement (https://www.springermedizin.de/resource/supplementary/12916_2010_347_MOESM1_ESM.pdf/9599688)
Supplement: MOESM1 [file 9599688]

# ENVIRONMENTAL TRIGGERS

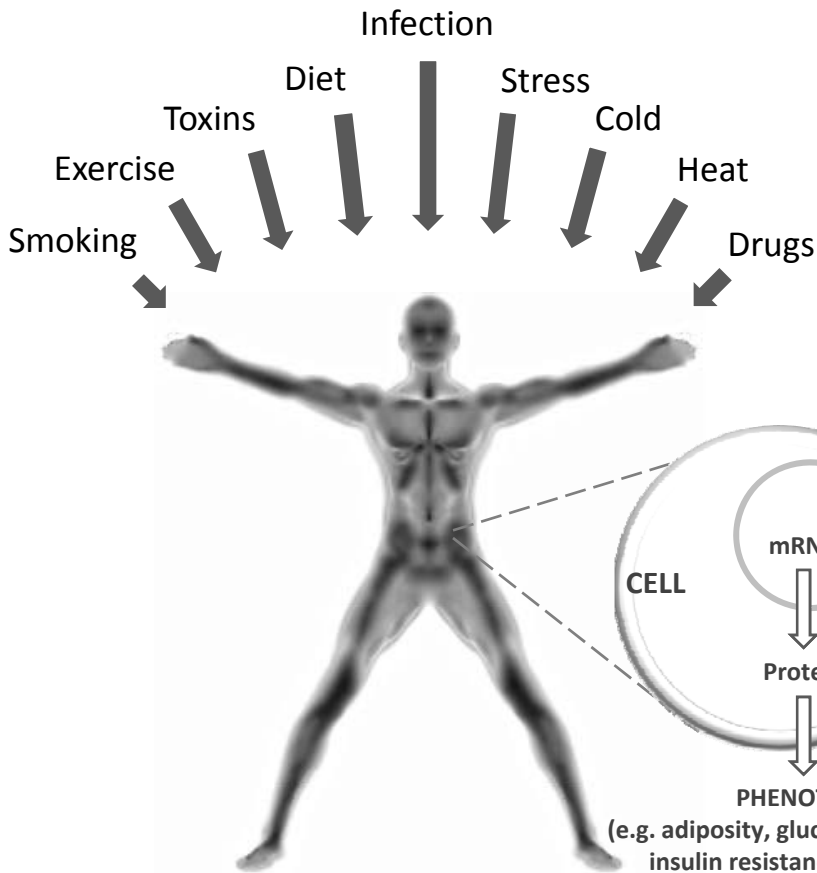

# GENETIC MACHINERY

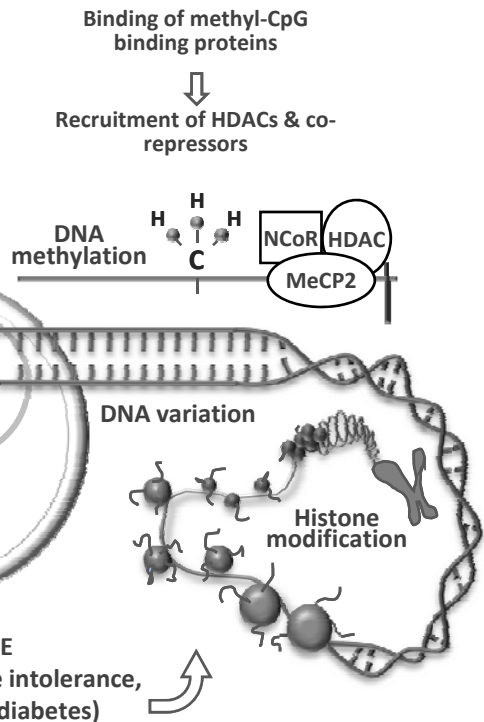

**PHENOTYPE**  
(e.g. adiposity, glucose intolerance, insulin resistance, diabetes)
